## Feeding and osmoregulation: dual function of the marine teleost intestine

Josi R. Taylor\* and Martin Grosell

*Rosenstiel School of Marine and Atmospheric Science, University of Miami, 4600 Rickenbacker Causeway, Miami, FL 33149-1098, USA*

\*Author for correspondence (e-mail: jtaylor@rsmas.miami.edu)

Accepted 22 May 2006

### Summary

Experiments on Gulf toadfish *Opsanus beta* demonstrate how feeding impacts osmoregulation in the marine teleost intestine. A high  $\text{Ca}^{2+}$  diet of pilchards *Sardina pilchardus* ( $[\text{Ca}^{2+}] = 404.2 \text{ mmol kg}^{-1}$ ) was compared to a low  $\text{Ca}^{2+}$  diet of common squid *Loligo forbesi* ( $[\text{Ca}^{2+}] = 1.3 \text{ mmol kg}^{-1}$ ), as high  $[\text{Ca}^{2+}]$  has been shown to stimulate intestinal anion exchange. Gastrointestinal fluids and blood plasma were collected over a time course from pre-feeding to 216 h post feeding. Following food intake, monovalent ions were largely absorbed across the intestinal epithelium, leaving a fluid rich in divalent ions, which have a lower osmotic coefficient and effectively reduce osmotic pressure in the lumen to allow for enhanced fluid absorption. Concentrations of  $\text{Cl}^-$  and  $\text{HCO}_3^-$  in fluid along the gastrointestinal tract of fish fed both diets, particularly 1 and 2 days post-feeding, demonstrate that apical  $\text{Cl}^-/\text{HCO}_3^-$  exchange plays a vital role in postprandial  $\text{Cl}^-$

and water absorption. Postprandial acid–base balance disturbance as indicated by plasma alkalization was limited or absent, indicating compensation for gastric acid secretion in this teleost fish. Plasma osmolality peaked 12 h post-feeding in toadfish fed squid, but was not accompanied by a significant increase in inorganic ion concentrations. Transient fluid secretion by the gastrointestinal tract was evident from reduced luminal  $\text{Mg}^{2+}$  and  $\text{SO}_4^{2-}$  concentrations for 24–48 h post feeding. Discrepancy between the sum of inorganic osmolytes and measured osmotic pressure was attributed to organic osmolytes, which occurred at high concentrations in the stomach and anterior intestine for up to 24 h post feeding.

Key words: acid–base balance, alkaline tide,  $\text{Cl}^-/\text{HCO}_3^-$  exchange, Gulf toadfish, *Opsanus beta*.

### Introduction

Feeding and subsequent nutrient absorption provide life-sustaining energy to all animals, and are inevitably accompanied by physiological consequences. Most comparative physiology studies of fishes in the last century have been done on animals starved at least 72 h to control for physiological variability resulting from a meal. Although significant work has been done regarding the effects of feeding on physiology in other vertebrate groups, similar studies of fishes have been less comprehensive or are specifically designed to meet aquaculture goals. Dabrowski et al. (Dabrowski et al., 1986) found that feeding in seawater and freshwater drastically changes the ionic balance in the euryhaline fish intestine, even though the salt intake that accompanies drinking in seawater fish largely surpassed dietary intake (Shehadeh and Gordon, 1969; Dabrowski et al., 1986). The acute nature of dietary salt intake may in itself induce an osmoregulatory challenge for the gastrointestinal tract. Marshall and Grosell note that a large meal for a piscivorous fish, for example, will provide a substantial  $\text{K}^+$  and  $\text{Ca}^{2+}$  load (from prey intracellular  $\text{K}^+$  and bone phosphate, respectively) (Marshall and Grosell, 2006), the consequences

of which remain to be examined. Additional intestinal salt load and systemic fluid loss might also result from bile, pancreatic and gastric secretions. Biliary secretions can carry  $\text{Na}^+$  concentrations of over  $300 \text{ mmol l}^{-1}$  (Grosell et al., 2000), pancreatic secretions in many species contain  $\text{HCO}_3^-$  concentrations up to  $140 \text{ mmol l}^{-1}$  (Novak, 2000) (for a review, see Steward et al., 2005), and gastric parietal cells are capable of secreting  $\text{Cl}^-$  into the mammalian gastric lumen at rates up to  $70 \text{ mmol l}^{-1} \text{ min}^{-1}$  (Thomas and Machen, 1991). In addition to potential osmoregulatory consequences of salt intake and gastrointestinal secretions, postprandial disruption to acid–base balance as a result of gastric acid secretion is possible, as occurs in many higher vertebrates. The ‘alkaline tide’ phenomenon recognized in amphibians, reptiles and mammals (for a review, see Wang et al., 2001) was recently demonstrated in an elasmobranch (Wood et al., 2005), representing the first instance of alkaline tide reported in fishes. The term alkaline tide refers to a significant alkalization of the blood following gastric acid secretion. The rate of gastric apical  $\text{H}^+$  secretion into the lumen is countered by basolateral efflux of  $\text{HCO}_3^-$  (metabolic base) via  $\text{Cl}^-/\text{HCO}_3^-$  exchange, which prevents alkalosis of the acid-secreting oxyntic

(mammals) or oxyntopeptic (non-mammalian vertebrates) cell. Basolateral  $\text{Cl}^-/\text{HCO}_3^-$  exchange provides  $\text{Cl}^-$  for gastric HCl secretion;  $\text{H}^+$  and  $\text{HCO}_3^-$  are created in these gastric epithelial cells by  $\text{CO}_2$  hydration, catalyzed by intracellular carbonic anhydrase (for a review, see Niv and Fraser, 2002).

In addition to digestion, the gastrointestinal tract of marine fish plays an important role in osmo- and iono-regulation, as hypo-osmoregulating fish have long been known to drink seawater to replace water lost diffusively to their environment. Ingested seawater passes through the gastrointestinal tract and ions must be differentially absorbed across the intestinal epithelium to facilitate water absorption. A large portion of  $\text{Cl}^-$  and water absorption in the intestine is accomplished *via* apical  $\text{Cl}^-/\text{HCO}_3^-$  exchange (Grosell et al., 2005), making intestinal anion exchange an important addition to long-recognized cotransporters  $\text{Na}^+-\text{Cl}^-$  and  $\text{Na}^+-\text{K}^+-2\text{Cl}^-$  in the marine teleost intestine. The  $\text{HCO}_3^-$  that is consequently secreted into the intestinal lumen is present at levels approximately five- to tenfold plasma concentrations (Wilson et al., 2002; Taylor and Grosell, 2006) in starved fishes, indicating an active transport mechanism (for a review, see Grosell, 2006).

Bicarbonate secretion also seems to play a role in calcium homeostasis, inhibiting intestinal  $\text{Ca}^{2+}$  absorption by precipitating  $\text{CaCO}_3$ , which is subsequently excreted (Wilson et al., 2002; Wilson and Grosell, 2003). This carbonate precipitation in itself also promotes water absorption, lowering osmolality by removing  $\text{Ca}^{2+}$  and  $\text{CO}_3^{2-}$  from solution (Wilson et al., 1996; Wilson et al., 2002; Marshall and Grosell, 2006). High  $\text{Ca}^{2+}$  concentrations alone (Wilson et al., 2002) and elevated ambient salinity (Walsh et al., 1991; McDonald and Grosell, 2006; Taylor and Grosell, 2006) have been shown to stimulate  $\text{HCO}_3^-$  secretion, which is not surprising considering the role of intestinal anion exchange in  $\text{Cl}^-$  and water absorption (Grosell et al., 2005) (for a review, see Grosell, 2006).

In designing our experiments we considered the potential of high salinity in general, and high  $\text{Ca}^{2+}$  concentrations specifically, to stimulate  $\text{Cl}^-/\text{HCO}_3^-$  exchange, along with the great osmoregulatory challenge we imagine must be associated with ingesting a large meal and associated salts. We aimed to explore the effects of a high  $\text{Ca}^{2+}$  and a low  $\text{Ca}^{2+}$  diet (and feeding in general) on intestinal  $\text{HCO}_3^-$  secretion and osmoregulation in Gulf toadfish *Opsanus beta*. By investigating the effects of feeding on gastrointestinal fluid chemistry, and thereby gaining more information about intestinal anion exchange, we aim to better understand the

function, regulation, and mechanism(s) of apical  $\text{Cl}^-/\text{HCO}_3^-$  exchange. Gastrointestinal fluids and blood plasma were sampled in a detailed time course post-feeding to reveal the timeline for organic and inorganic nutrient absorption across the intestine for differing diet composition. In addition, a detailed time course of blood plasma chemistry allowed for investigation of the possibility of postprandially disturbed acid–base balance and osmoregulatory compromise.

## Materials and methods

### Animal care

Gulf toadfish *Opsanus beta* (Goode and Bean 1880) were obtained as bycatch from local shrimp fishermen based on Virginia Key, FL, USA. Following transport to the University of Miami (RSMAS), fish were subject to a prophylactic treatment against ectoparasites as described previously (McDonald et al., 2003). Toadfish were held in aerated, 75 liter tanks receiving a flow-through of natural seawater at ambient temperature and salinity ( $26\pm 2.0^\circ\text{C}$ ,  $35\pm 2.0\text{‰}$ , mean and range) and fed their respective experimental diet (see below) to satiation once weekly, for approximately 3 weeks prior to experimentation.

### General experimental procedures

Two natural experimental diets were determined based on our knowledge of  $\text{Ca}^{2+}$ -induced  $\text{HCO}_3^-$  secretion in European flounder. A squid diet (*Loligo forbesi*, see Table 1 for inorganic ion composition) represented a low  $\text{Ca}^{2+}$  meal, while a fish diet (*Sardina pilchardus*, see Table 1 for inorganic ion composition) corresponded to a relatively high  $\text{Ca}^{2+}$  meal. Both experimental diets represent realistic meals for *O. beta*. Gulf toadfish were starved for 12 days prior to feeding to ensure resting conditions. In the initial experiment, 60 fish (mass  $64\pm 3.5$  g, mean  $\pm$  s.e.m.) were fed one of the two experimental diets to satiation (all uneaten food was removed after 30 min) and terminally sampled in groups of five fish pre-feeding (12 days following their last meal), 1, 2, 3, 6 and 9 days after feeding. Based on the results of this first experiment, follow-up sampling was done on another 50 toadfish (mass  $80\pm 3.5$  g) fed the same two diets and sampled in groups of five fish pre-feeding (again 12 days following their last meal), 3, 6, 12 and 24 h after feeding. The final data set comprises timepoints 0, 3, 6, 12, 24, 48, 72, 144 and 216 h post-feeding. Data reported in the 24 h timepoint were taken exclusively from the second

Table 1. Mean composition of experimental diets (per kg wet mass) for pilchards *Sardina pilchardus* and common squid *Loligo forbesi*

|                           | Concentration (mmol kg <sup>-1</sup> ) |                     |                    |                   |                    |                                  |
|---------------------------|----------------------------------------|---------------------|--------------------|-------------------|--------------------|----------------------------------|
|                           | [Mg <sup>2+</sup> ]                    | [Ca <sup>2+</sup> ] | [Na <sup>+</sup> ] | [K <sup>+</sup> ] | [Cl <sup>-</sup> ] | [SO <sub>4</sub> <sup>2-</sup> ] |
| <i>Loligo forbesi</i>     | 21.0±0.73                              | 1.3±0.21            | 121.1±5.54         | 61.0±3.33         | 141.2±2.87         | 4.9±0.39                         |
| <i>Sardina pilchardus</i> | 30.2±2.33                              | 404.2±24.8          | 123.3±4.44         | 70.2±3.89         | 116.6±7.54         | 4.6±0.22                         |

Values are means  $\pm$  s.e.m. (N=3).

experiment as sample time was monitored more precisely in this more detailed trial. Experimental fish were euthanized by a tricaine methane sulfonate overdose ( $0.5 \text{ g l}^{-1}$  MS-222, pH 8.0), after which a blood sample (200–400  $\mu\text{l}$ ) was obtained by caudal puncture into a heparinized syringe fitted with a gauge 22 needle, and placed on ice. The entire gastrointestinal tract was then carefully removed and ligated with silk ligatures into stomach, anterior, mid, posterior and rectal segments as previously described (Grosell et al., 2004). Each section was removed and contents were drained into 2 ml plastic microcentrifuge tubes (15 ml Falcon tubes for stomach contents) for analysis. At the 3 h timepoint, while most of the ingested meal remained in the stomach, contents were weighed to estimate meal size relative to body mass. Our experimental design was such that fish sampled at each timepoint ( $N=5$ ) were taken exclusively from one 75 liter tank containing only these fish. Thus, any effects of dominance/hierarchy on food intake would have revealed themselves amongst the five fish from each diet sacrificed at 3 h post-feeding and used to estimate meal size.

#### Sample analysis

All blood samples were promptly analyzed for hematocrit and then centrifuged (2 min at 15 700  $g$ ). Plasma was retained in addition to gastrointestinal fluid samples (only the supernatant of gastrointestinal fluid samples was retained after centrifugation to eliminate reaction with solid meal remains) for immediate analysis of pH (Accumet pH electrode connected to a Radiometer PHM220 pH meter, Copenhagen, Denmark). Total  $\text{CO}_2$  was analyzed using a Corning 965 Carbon Dioxide Analyzer (Corning, NY, USA) and osmolality was measured using a vapor pressure osmometer (Wescor Vapro 5520, Logan, UT, USA). Samples were stored at  $-20^\circ\text{C}$  for subsequent analysis of inorganic anions (Dionex DX-120, Sunnyvale, CA, USA) and cations (Fast Sequential atomic absorption spectrophotometry, Varian FS220, Palo Alto, CA, USA) after appropriate dilution.

#### Osmotic coefficient calculation

Osmotic coefficients of representative monovalent (NaCl) and divalent ( $\text{MgSO}_4$ ) solutions were calculated by making, in triplicate,  $150 \text{ mmol l}^{-1}$  solutions of each and measuring osmolality using a vapor pressure osmometer (Wescor Vapro 5520). The osmotic coefficient was calculated by dividing the measured osmotic pressure of each solution by 300 mOsm (the expected osmotic pressure assuming an osmotic coefficient=1).

#### Statistical analyses

Due to variable amounts of fluid present in each gastrointestinal segment at different stages after a meal, means were generally from five samples (except for the control timepoint, in which up to ten samples were collected for each parameter), but at times, some samples were too small to be analyzed for every parameter. Of a total 720 means, 8% (59) contained 10 samples; 3% (19) contained 9 samples; <1% (2)

contained 8 samples; 63% (455) contained 5 samples; 17% (119) contained 4 samples; 5% (36) contained 3 samples, 3% (21) contained 2 samples, 1% (8) contained 1 sample, and <1% (1) means were omitted because no samples contained sufficient fluid for analysis. Data are presented as means  $\pm$  1 s.e.m. In analyses of organic nutrient absorption, total inorganic ion concentration was calculated from the inorganic ion concentrations measured in each sample for each time point (including only samples in which sufficient fluid was collected to measure every ion). This provides a conservative estimate of osmotic pressure exerted by inorganic ions by assuming an osmotic coefficient of one. Because data were not normally distributed, Kruskal–Wallis one-way analysis of variance (ANOVA) on ranks was used to evaluate all data, followed, where applicable, by comparisons of each parameter at each time point to control values by Dunn's method. When only two groups were compared, a Mann–Whitney Rank Sum test was used to determine statistically significant differences. Means were considered significantly different at  $P<0.05$ . For the sake of clarity, significant differences are not noted in figures or tables but rather are described in detail in the Results section.

## Results

The meal sizes of toadfish fed our two experimental diets were not significantly different when fed to satiation. Toadfish fed sardines ingested an estimated  $9\pm 2.4\%$  of their body mass ( $N=5$ ), and toadfish fed squid consumed an estimated  $9\pm 1.3\%$  of their body mass ( $N=5$ ; based on the mass of stomach contents in fish sampled 3 h after feeding). Feeding to satiation ensured that adequate food was available to all fish, and we did not observe signs of hierarchy during feeding events. We found the ingested meal to be cleared completely from the stomach between 24 and 48 h after feeding for both diets.

#### Postprandial intestinal $\text{Cl}^-/\text{HCO}_3^-$ exchange

In both high and low  $\text{Ca}^{2+}$  diets, pH (Fig. 1) and total  $\text{CO}_2$  ( $\text{HCO}_3^-$  equivalents, Fig. 2) levels in gastrointestinal fluids indicated that postprandially increased  $\text{HCO}_3^-$  secretion acted as a buffer for  $\text{H}^+$  secreted and subsequently released from the stomach with chyme. Between 3 and 24 h post-feeding, intestinal fluid  $\text{HCO}_3^-$  equivalents were reduced to as little as 50% of control levels (Fig. 2, Table 2), a decrease that was statistically significant only in the mid intestinal fluid 3 h after feeding a squid diet. Luminal pH was also slightly depressed at these timepoints, especially in the anterior and mid intestinal fluid (Fig. 1, Table 2), where pH was significantly reduced from control levels 3 h after feeding sardines. Correspondingly, 48 h after feeding (presumably once stomach secretions were neutralized), a dramatic increase in  $\text{HCO}_3^-$  equivalents was measured relative to control levels. Bicarbonate equivalents on average were present at 231% and 204% of control levels in the anterior intestinal fluid 48 h after feeding fish and squid diets, respectively (Fig. 2, Table 2), although limited sample sizes prohibited statistical significance. This rise over control  $\text{HCO}_3^-$  concentrations was

Table 2. Chemistry and inorganic ion composition of intestinal fluid from *O. beta* fed (A) squid and (B) sardines

|                    | pH         | Concentration (mmol l <sup>-1</sup> ) |                    |                    |                     |                   |                     |                                  |
|--------------------|------------|---------------------------------------|--------------------|--------------------|---------------------|-------------------|---------------------|----------------------------------|
|                    |            | Total CO <sub>2</sub>                 | [Cl <sup>-</sup> ] | [Na <sup>+</sup> ] | [Ca <sup>2+</sup> ] | [K <sup>+</sup> ] | [Mg <sup>2+</sup> ] | [SO <sub>4</sub> <sup>2-</sup> ] |
| (A) Squid diet     |            |                                       |                    |                    |                     |                   |                     |                                  |
| Pre-feeding (0 h)  |            |                                       |                    |                    |                     |                   |                     |                                  |
| Anterior           | 8.51±0.155 | 32.7±11.38                            | 93.0±19.47         | 62.3±16.74         | 2.5±0.52            | 6.2±2.99          | 95.3±23.38          | 63.7±11.71                       |
| Mid                | 8.50±0.120 | 62.4±4.03                             | 51.9±4.82          | 29.8±6.07          | 1.8±0.65            | 1.7±0.43          | 158.5±11.69         | 97.1±6.44                        |
| Posterior          | 8.70*      | 72.9±3.72                             | 49.4±4.83          | 19.8±2.78          | 2.3±0.86            | 5.2±1.99          | 133.9±10.41         | 104.7±3.19                       |
| Rectal             | 8.78±0.013 | 68.3±7.71                             | 30.7±4.22          | 10.4±0.79          | 2.1±0.69            | 1.1±0.04          | 135.8±14.04         | 93.8±8.96                        |
| 3 h post-feeding   |            |                                       |                    |                    |                     |                   |                     |                                  |
| Anterior           | 8.14±0.096 | 20.6±3.63                             | 36.0±8.28          | 71.9±9.12          | 4.0±0.48            | 7.0±1.02          | 34.4±5.31           | 26.8±1.40                        |
| Mid                | 8.33±0.042 | 29.2±4.47                             | 35.3±8.72          | 83.0±17.77         | 3.6±1.25            | 3.9±0.56          | 62.0±18.03          | 41.1±11.34                       |
| Posterior          | 8.47±0.081 | 54.9±3.73                             | 38.0±5.76          | 48.2±8.44          | 3.4±0.49            | 3.1±0.52          | 144.2±16.15         | 83.9±8.59                        |
| Rectal             | 8.80±0.032 | 59.0±9.26                             | 28.7±6.64          | 17.7±6.12          | 3.1±0.99            | 1.8±0.22          | 127.5±18.39         | 78.7±11.94                       |
| 6 h post-feeding   |            |                                       |                    |                    |                     |                   |                     |                                  |
| Anterior           | 8.08±0.119 | 50.5±10.05                            | 23.7±8.34          | 64.7±14.02         | 10.3±3.56           | 3.6±0.37          | 66.0±16.87          | 48.3±8.18                        |
| Mid                | 8.27±0.112 | 55.2±14.72                            | 13.5±3.77          | 71.0±19.40         | 6.9±2.84            | 2.7±0.26          | 80.7±30.47          | 56.4±15.01                       |
| Posterior          | 8.37±0.025 | 65.2±18.11                            | 19.5±6.54          | 56.6±18.96         | 3.4±0.79            | 2.9±0.32          | 73.2±14.34          | 77.2±19.24                       |
| Rectal             | 8.74±0.141 | 55.1±11.27                            | 15.5±6.97          | 16.2±5.90          | 5.5±0.36            | 1.4±0.14          | 106.0±22.94         | 78.5±16.07                       |
| 12 h post-feeding  |            |                                       |                    |                    |                     |                   |                     |                                  |
| Anterior           | 7.99±0.021 | 34.4±2.11                             | 37.3±5.07          | 85.3±14.23         | 9.6±0.37            | 4.5±0.42          | 77.1±7.32           | 36.1±2.79                        |
| Mid                | 8.39±0.024 | 49.0±3.86                             | 13.7±1.47          | 39.2±6.62          | 9.7±1.56            | 2.0±0.15          | 111.4±13.46         | 55.6±4.27                        |
| Posterior          | 8.44±0.036 | 48.6±4.56                             | 15.6±2.00          | 21.5±3.70          | 8.5±1.81            | 1.9±0.05          | 108.8±13.65         | 56.5±6.47                        |
| Rectal             | 8.16±0.575 | 62.0±36.60                            | 24.5±9.36          | 9.6±4.17           | 3.9*                | 1.0±0.10          | 78.6±32.74          | 60.7±26.26                       |
| 24 h post-feeding  |            |                                       |                    |                    |                     |                   |                     |                                  |
| Anterior           | 7.81±0.084 | 42.1±5.63                             | 29.9±3.41          | 54.3±22.00         | 13.0±1.55           | 5.0±0.26          | 100.4±18.64         | 67.1±8.21                        |
| Mid                | 8.06±0.035 | 41.7±3.66                             | 14.4±2.18          | 64.6±16.76         | 15.6±2.09           | 3.6±0.26          | 91.5±16.50          | 84.9±4.62                        |
| Posterior          | 8.24±0.101 | 44.4±5.44                             | 18.5±2.18          | 40.4±11.86         | 11.9±2.16           | 2.8±0.24          | 115.7±12.75         | 76.0±5.81                        |
| Rectal             | 8.56±0.113 | 50.4±5.99                             | 13.6±2.33          | 8.5±2.97           | 6.7±1.87            | 1.9±0.35          | 81.5±22.49          | 56.4±8.07                        |
| 48 h post-feeding  |            |                                       |                    |                    |                     |                   |                     |                                  |
| Anterior           | 8.20±0.162 | 66.5±5.22                             | 53.6±10.56         | 37.6±4.54          | 7.7±0.80            | 2.1±0.36          | 140.6±3.02          | 109.1±6.39                       |
| Mid                | 8.14±0.204 | 69.1±5.68                             | 41.9±10.95         | 37.1±4.78          | 7.8±1.68            | 1.8±0.19          | 167.4±5.29          | 137.2±10.16                      |
| Posterior          | 8.36±0.122 | 74.1±7.19                             | 37.5±8.63          | 38.7±10.14         | 7.6±1.37            | 2.9±0.57          | 166.5±10.33         | 129.4±10.17                      |
| Rectal             | 8.41±0.093 | 63.0±6.77                             | 21.7±1.67          | 20.7±7.95          | 8.1±0.76            | 1.8±0.34          | 167.2±10.23         | 131.5±7.67                       |
| 72 h post-feeding  |            |                                       |                    |                    |                     |                   |                     |                                  |
| Anterior           | 8.55*      | 52.1±9.82                             | 101.6±14.66        | 60.3±18.21         | 4.5±1.05            | 4.2±1.28          | 113.9±17.75         | 73.1±17.80                       |
| Mid                | 8.66±0.020 | 71.3±6.75                             | 76.0±10.20         | 27.5±7.43          | 5.9±1.08            | 3.1±0.45          | 141.5±12.96         | 79.3±9.39                        |
| Posterior          | 8.73*      | 79.1±4.07                             | 82.2±8.67          | 33.9±7.76          | 4.0±1.43            | 4.4±0.98          | 159.5±14.06         | 98.0±10.42                       |
| Rectal             | 8.80±0.035 | 78.4±5.26                             | 49.8±8.25          | 13.9±1.24          | 4.1±0.93            | 1.2±1.05          | 133.1±15.50         | 87.8±10.50                       |
| 144 h post-feeding |            |                                       |                    |                    |                     |                   |                     |                                  |
| Anterior           | 8.61±0.046 | 60.0±3.18                             | 81.6±4.10          | 31.4±3.44          | 4.1±0.69            | 3.9±1.09          | 119.3±7.70          | 69.6±7.86                        |
| Mid                | 8.64±0.045 | 81.4±5.71                             | 57.6±5.53          | 22.3±4.28          | 2.6±0.61            | 2.5±0.83          | 147.6±19.78         | 72.9±15.93                       |
| Posterior          | 8.62*      | 84.8±4.45                             | 71.1±10.80         | 23.3±2.48          | 3.3±1.32            | 1.5±0.47          | 173.0±8.27          | 90.9±5.42                        |
| Rectal             | 8.76±0.055 | 83.7±8.13                             | 41.4±5.38          | 12.7±1.65          | 1.3±0.37            | 0.3±0.09          | 158.0±19.43         | 81.4±11.04                       |
| 216 h post-feeding |            |                                       |                    |                    |                     |                   |                     |                                  |
| Anterior           | 8.68±0.035 | 78.5±8.12                             | 78.5±7.32          | 41.9±6.35          | 3.4±0.70            | 5.1±1.00          | 132.5±12.93         | 38.1±22.66                       |
| Mid                | 8.68±0.027 | 77.5±12.36                            | 63.8±11.49         | 28.8±4.18          | 2.7±0.87            | 2.6±0.85          | 158.6±14.51         | 75.2±9.93                        |
| Posterior          | 8.69±0.027 | 81.4±10.47                            | 60.1±7.66          | 22.4±2.46          | 1.9±0.73            | 1.7±0.47          | 153.7±9.92          | 46.6±15.97                       |
| Rectal             | 8.72±0.018 | 89.0±3.92                             | 53.2±3.00          | 18.4±2.17          | 2.9±0.11            | 0.9±0.19          | 170.9±5.42          | 58.8±11.89                       |

Table 2. Continued

|                    | pH         | Concentration (mmol l <sup>-1</sup> ) |                    |                    |                     |                   |                     |                                  |
|--------------------|------------|---------------------------------------|--------------------|--------------------|---------------------|-------------------|---------------------|----------------------------------|
|                    |            | Total CO <sub>2</sub>                 | [Cl <sup>-</sup> ] | [Na <sup>+</sup> ] | [Ca <sup>2+</sup> ] | [K <sup>+</sup> ] | [Mg <sup>2+</sup> ] | [SO <sub>4</sub> <sup>2-</sup> ] |
| (B) Sardine diet   |            |                                       |                    |                    |                     |                   |                     |                                  |
| Pre-feeding (0 h)  |            |                                       |                    |                    |                     |                   |                     |                                  |
| Anterior           | 8.47±0.047 | 34.0±13.00                            | 101.2±8.19         | 91.0±13.84         | 2.4±0.63            | 6.5±1.08          | 52.2±22.33          | 45.4±13.33                       |
| Mid                | 8.86±0.125 | 48.3±6.38                             | 84.4±5.48          | 76.5±21.61         | 2.3±0.52            | 4.1±0.71          | 81.7±26.66          | 44.5±14.88                       |
| Posterior          | †          | 66.5±17.50                            | 84.2±9.61          | 77.5±32.29         | 2.4±1.31            | 4.7±0.98          | 115.5±34.43         | 62.3±18.81                       |
| Rectal             | 8.86±0.079 | 54.2±9.06                             | 43.2±11.10         | 15.1±3.31          | 1.0±0.23            | 1.7±0.07          | 133.3±37.83         | 65.2±16.46                       |
| 3 h post-feeding   |            |                                       |                    |                    |                     |                   |                     |                                  |
| Anterior           | 7.19±0.202 | 18.2±2.75                             | 72.3±7.80          | 88.9±17.21         | 17.3±5.94           | 10.1±1.40         | 56.9±10.56          | 41.7±4.89                        |
| Mid                | 8.05±0.083 | 40.3±5.03                             | 38.6±6.36          | 73.9±17.53         | 12.1±4.39           | 3.6±0.46          | 78.1±16.75          | 54.0±6.04                        |
| Posterior          | 8.27±0.108 | 46.9±8.02                             | 31.7±5.91          | 66.2±17.06         | 8.5±3.07            | 3.2±0.39          | 91.0±21.87          | 64.8±7.92                        |
| Rectal             | 8.87±0.128 | 49.6±3.53                             | 19.6±4.69          | 18.5±9.61          | 1.6±0.85            | 1.5±0.20          | 86.6±23.46          | 61.7±8.45                        |
| 6 h post-feeding   |            |                                       |                    |                    |                     |                   |                     |                                  |
| Anterior           | 7.50±0.105 | 23.2±5.26                             | 64.7±7.84          | 75.6±8.23          | 21.3±4.48           | 4.7±0.45          | 63.9±2.58           | 49.9±4.33                        |
| Mid                | 8.29±0.047 | 41.6±3.01                             | 30.4±4.57          | 58.5±6.14          | 14.6±1.20           | 2.8±0.17          | 94.5±3.66           | 67.7±3.26                        |
| Posterior          | 8.54±0.061 | 49.7±4.63                             | 25.9±4.47          | 44.8±6.66          | 10.9±1.72           | 2.6±0.23          | 127.1±15.13         | 76.0±7.34                        |
| Rectal             | 8.82±0.054 | 68.7±10.02                            | 24.3±5.32          | 17.2±5.10          | 2.9±1.44            | 1.6±0.24          | 125.5±25.18         | 70.7±13.57                       |
| 12 h post-feeding  |            |                                       |                    |                    |                     |                   |                     |                                  |
| Anterior           | 7.79±0.146 | 32.8±4.44                             | 40.1±6.11          | 92.2±12.26         | 19.3±5.27           | 5.2±0.64          | 68.0±14.24          | 22.6±8.77                        |
| Mid                | 8.18±0.077 | 42.9±5.86                             | 16.9±3.06          | 82.4±12.91         | 14.4±2.06           | 3.4±0.40          | 93.1±16.66          | 47.4±10.68                       |
| Posterior          | 8.41±0.120 | 51.3±7.32                             | 14.9±3.46          | 41.9±4.64          | 11.1±1.82           | 2.2±0.20          | 134.7±15.19         | 67.8±9.59                        |
| Rectal             | 8.58±0.057 | 48.5±15.52                            | 16.1±8.05          | 17.8±3.80          | 5.9±2.04            | 1.5±0.14          | 115.1±26.29         | 41.6±12.41                       |
| 24 h post-feeding  |            |                                       |                    |                    |                     |                   |                     |                                  |
| Anterior           | 8.06±0.262 | 47.2±9.73                             | 41.5±8.63          | 77.1±24.12         | 7.9±3.05            | 3.7±0.83          | 110.0±26.17         | 45.8±13.55                       |
| Mid                | 8.24±0.151 | 51.1±9.09                             | 15.6±7.17          | 64.5±17.36         | 11.4±2.07           | 2.8±0.44          | 140.0±19.30         | 83.2±6.35                        |
| Posterior          | 8.49*      | 47.0±8.29                             | 19.9±3.25          | 73.0±22.63         | 10.1±3.62           | 2.9±0.48          | 131.3±26.75         | 76.6±10.33                       |
| Rectal             | 8.37±0.048 | 32.7±7.82                             | 8.3±5.37           | 26.7±7.81          | 12.2±2.65           | 2.0±0.09          | 129.6±18.20         | 72.8±12.03                       |
| 48 h post-feeding  |            |                                       |                    |                    |                     |                   |                     |                                  |
| Anterior           | 8.59±0.138 | 78.6±15.15                            | 76.7±16.06         | 57.2±21.84         | 2.8±0.06            | 2.3±0.82          | 112.5±30.06         | 72.4±14.26                       |
| Mid                | 8.67±0.086 | 100.2±13.18                           | 58.8±11.57         | 72.8±25.71         | 5.0±1.65            | 2.8±0.54          | 128.6±24.09         | 83.6±11.21                       |
| Posterior          | 8.73±0.120 | 105.6±14.58                           | 43.8±7.64          | 71.4±26.13         | 2.8±0.33            | 3.4±0.86          | 125.3±29.48         | 82.4±13.45                       |
| Rectal             | 7.93±0.260 | 68.5±7.27                             | 43.0±10.47         | 41.4±16.72         | 7.0±2.28            | 4.5±1.56          | 165.5±40.27         | 121.9±19.35                      |
| 72 h post-feeding  |            |                                       |                    |                    |                     |                   |                     |                                  |
| Anterior           | 8.33*      | 43.0±11.78                            | 100.1±11.37        | 62.5±14.74         | 3.1±0.21            | 4.1±1.06          | 104.3±17.66         | 58.6±11.00                       |
| Mid                | 8.66±0.114 | 68.9±5.53                             | 74.1±3.17          | 32.5±1.77          | 2.7±0.39            | 4.5±1.84          | 145.7±4.40          | 83.7±2.85                        |
| Posterior          | 8.90±0.087 | 82.8±4.34                             | 62.9±2.00          | 26.2±1.84          | 2.5±0.37            | 2.5±1.06          | 149.3±4.50          | 86.8±2.79                        |
| Rectal             | 8.77±0.064 | 84.3±8.13                             | 45.5±4.42          | 19.1±1.35          | 3.6±1.08            | 0.7±0.10          | 197.5±1.11          | 123.6±7.87                       |
| 144 h post-feeding |            |                                       |                    |                    |                     |                   |                     |                                  |
| Anterior           | 8.69±0.030 | 52.6±9.61                             | 100.6±5.94         | 63.7±14.71         | 4.6±0.41            | 7.1±1.36          | 98.3±17.44          | 52.3±9.36                        |
| Mid                | 8.57±0.050 | 73.5±10.08                            | 81.9±4.57          | 31.5±4.24          | 3.5±0.43            | 3.3±0.66          | 139.6±6.35          | 76.9±4.46                        |
| Posterior          | 8.66*      | 69.4±6.48                             | 88.6±6.75          | 29.2±3.67          | 5.0±1.30            | 4.4±1.17          | 151.4±9.66          | 82.4±5.88                        |
| Rectal             | 8.75±0.031 | 69.7±5.73                             | 73.5±6.96          | 23.2±3.70          | 2.5±0.14            | 0.8±0.22          | 170.8±9.46          | 93.6±6.87                        |
| 216 h post-feeding |            |                                       |                    |                    |                     |                   |                     |                                  |
| Anterior           | 8.52±0.025 | 55.8±9.01                             | 80.2±8.63          | 41.6±2.92          | 3.2±0.80            | 2.3±0.44          | 98.9±15.89          | 54.0±8.65                        |
| Mid                | 8.69±0.040 | 77.4±5.41                             | 63.9±5.39          | 29.3±4.57          | 3.1±0.63            | 1.8±0.48          | 156.7±11.03         | 86.3±6.43                        |
| Posterior          | 8.56±0.020 | 78.5±6.95                             | 62.9±3.44          | 22.1±1.26          | 1.9±0.54            | 1.8±0.35          | 162.4±6.58          | 90.7±3.20                        |
| Rectal             | 8.63±0.050 | 65.3±13.96                            | 59.7±10.33         | 15.1±1.30          | 2.7±1.25            | 0.9±0.34          | 163.7±14.63         | 84.9±6.69                        |

Values are means ± s.e.m. (*N* varies, see text).

\**N*=1.

†*N*=0.



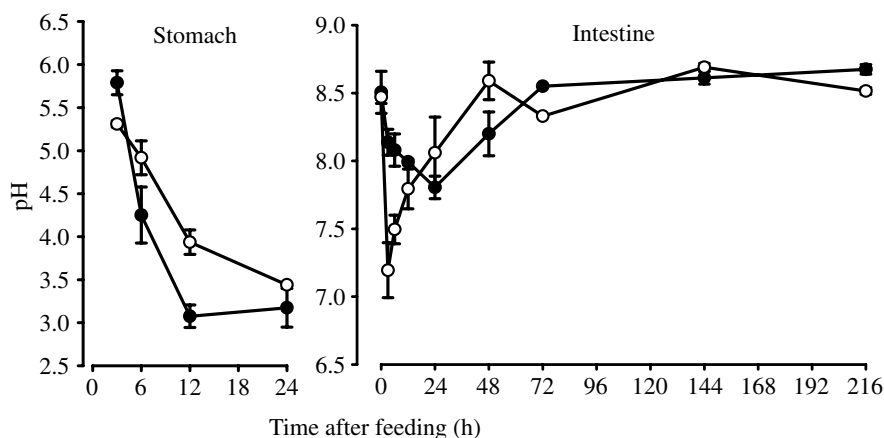

Fig. 1. pH in the stomach and anterior intestinal fluids of *Opsanus beta* fed squid (filled circles) and fish (open circles). Values are means  $\pm$  1 s.e.m.,  $N=5$  for most samples, as described in text.

most dramatic in the anterior intestine of both diets 48 h post feeding, and was sequentially less pronounced in the more posterior sections, indicating that postprandial  $\text{HCO}_3^-$  secretion might be prevalent in the anterior intestine. Notably, these  $\text{HCO}_3^-$  measurements are based exclusively on intestinal fluid concentrations, and neglect to account for any additional increases in  $\text{HCO}_3^-$  concentration accounted for by  $\text{CaCO}_3$  precipitation. Overall,  $\text{HCO}_3^-$  concentrations of intestinal fluids ranged from 4- to 20-fold control plasma levels (Tables 2 and 3, respectively).

Postprandial luminal  $\text{Cl}^-$  concentrations (Fig. 3, Table 2) in both diets support an increase in intestinal  $\text{Cl}^-/\text{HCO}_3^-$  exchange post-feeding. Intestinal fluid  $\text{Cl}^-$  concentrations were reduced from control levels between 3 and 48 h post-feeding in both squid and sardine diets. This difference from control conditions was statistically significant in the anterior, mid and posterior intestinal fluid between 6 and 24 h post-feeding in toadfish fed a squid diet, and at 12 h and 24 h timepoints in toadfish fed sardines. Additionally, a slight (though not statistically significant using Kruskal–Wallis one-way ANOVA on ranks) increase in plasma  $\text{Cl}^-$  concentration over control levels was measured between 12 and 48 h post feeding in toadfish fed squid (Table 3).

While luminal  $\text{Cl}^-$  concentrations were reduced post-

feeding, no such trend was observed for  $\text{Na}^+$  concentrations (Fig. 4, Table 2), yielding additional evidence for enhanced postprandial apical  $\text{Cl}^-/\text{HCO}_3^-$  exchange as opposed to  $\text{Na}^+/\text{Cl}^-$  cotransport.

#### Consequences of high dietary $\text{Ca}^{2+}$ and $\text{K}^+$ loads

While unfed (control) toadfish maintained low intestinal  $\text{Ca}^{2+}$  concentrations, fed toadfish experienced up to a tenfold postprandial increase in intestinal  $\text{Ca}^{2+}$  concentrations (Fig. 5, Table 2). In toadfish fed a squid diet,  $\text{Ca}^{2+}$  concentrations were significantly elevated over control conditions at 24 h post-feeding in the anterior intestine fluid, 12 and 24 h post-feeding in mid and posterior intestine fluid, and 48 h post-feeding in rectal fluid. In toadfish fed sardines, however,  $\text{Ca}^{2+}$  seemed to be liberated into the intestinal fluid sooner, as concentrations were significantly elevated at 6 and 12 h post-feeding in the anterior and mid intestine fluid, and 24 h post-feeding in the rectal fluid. A notable difference in diet composition was evident in stomach  $\text{Ca}^{2+}$  concentrations, which were significantly higher in fish fed sardines and maximal 12 h post-feeding ( $77.4 \pm 6.52 \text{ mmol l}^{-1}$ ) in these fish (Fig. 5B). In toadfish fed a squid diet, stomach  $\text{Ca}^{2+}$  concentrations were maximal 3 h post-feeding ( $6.8 \pm 0.32 \text{ mmol l}^{-1}$ ; Fig. 5A). Despite the intense  $\text{Ca}^{2+}$  load

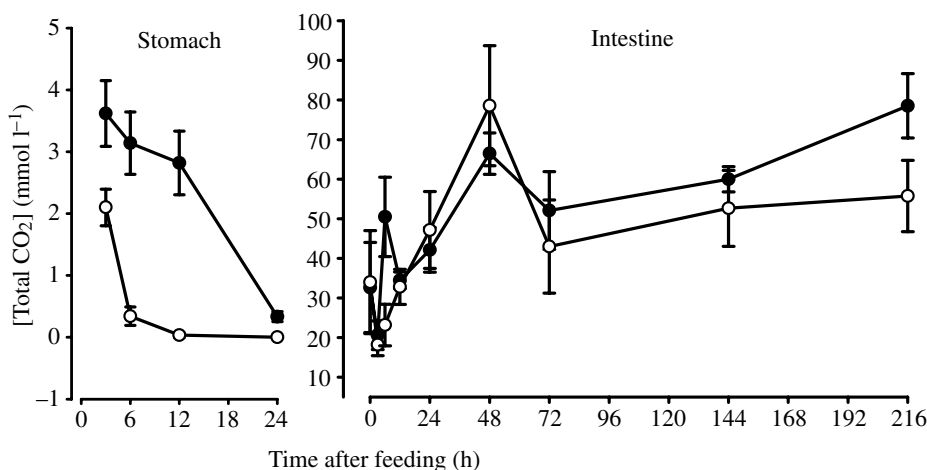

Fig. 2. Total  $\text{CO}_2$  ( $\text{HCO}_3^-$  equivalents) in the stomach and anterior intestinal fluids of *Opsanus beta* fed squid (filled circles) and fish (open circles). Values are means  $\pm$  1 s.e.m.,  $N=5$  for most samples, as described in text.

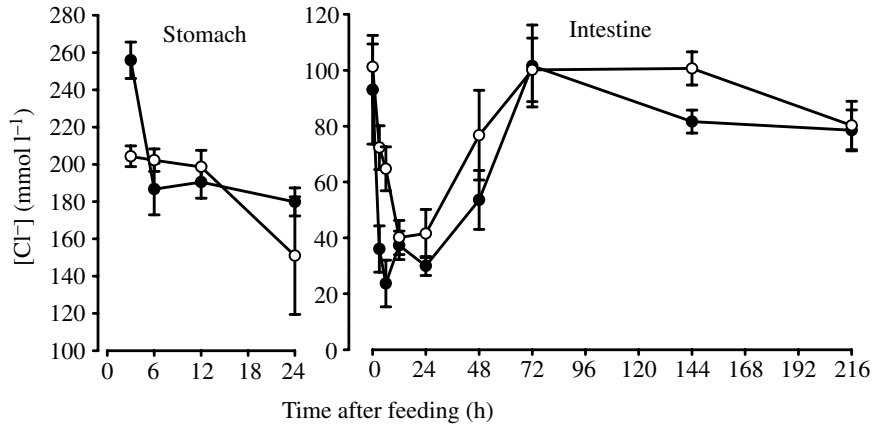

Fig. 3.  $Cl^-$  concentrations in the stomach and anterior intestinal fluids of *Opsanus beta* fed squid (filled circles) and fish (open circles). Values are means  $\pm 1$  s.e.m.,  $N=5$  for most samples, as described in text.

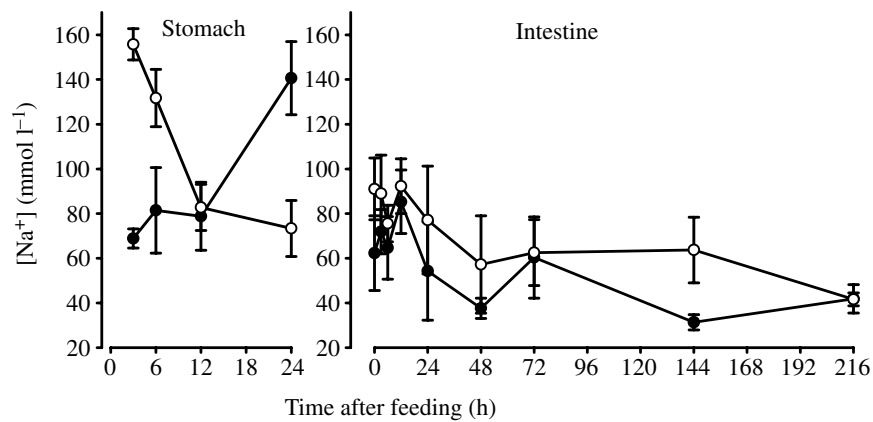

Fig. 4.  $Na^+$  concentrations in the stomach and anterior intestinal fluids of *Opsanus beta* fed squid (filled circles) and fish (open circles). Values are means  $\pm 1$  s.e.m.,  $N=5$  for most samples, as described in text.

Table 3. Chemistry and inorganic ion composition of blood plasma from *O. beta* fed (A) squid and (B) sardines

| Time after feeding (h)  | pH               | Osmolality (mOsm) | Hematocrit (%) | Concentration (mmol $l^{-1}$ ) |                  |                   |                |                |
|-------------------------|------------------|-------------------|----------------|--------------------------------|------------------|-------------------|----------------|----------------|
|                         |                  |                   |                | Total $CO_2$                   | $[Cl^-]$         | $[Na^+]$          | $[K^+]$        | $[Ca^{2+}]$    |
| <b>(A) Squid diet</b>   |                  |                   |                |                                |                  |                   |                |                |
| 0 (Control)             | 7.74 $\pm$ 0.038 | 310 $\pm$ 2.4     | 34 $\pm$ 2.3   | 5.2 $\pm$ 0.59                 | 118.5 $\pm$ 1.44 | 143.6 $\pm$ 2.95  | 2.5 $\pm$ 0.15 | 2.0 $\pm$ 0.14 |
| 3                       | 7.96 $\pm$ 0.038 | 319 $\pm$ 1.7     | 23 $\pm$ 1.6   | 3.3 $\pm$ 0.51                 | 116.2 $\pm$ 0.70 | 134.9 $\pm$ 3.72  | 2.6 $\pm$ 0.25 | 1.5 $\pm$ 0.11 |
| 6                       | 7.75 $\pm$ 0.041 | 318 $\pm$ 1.9     | 27 $\pm$ 2.6   | 4.7 $\pm$ 0.37                 | 118.1 $\pm$ 2.76 | 137.5 $\pm$ 4.47  | 3.2 $\pm$ 0.59 | 2.3 $\pm$ 0.15 |
| 12                      | 7.86 $\pm$ 0.018 | 326 $\pm$ 2.4     | 31 $\pm$ 3.0   | 5.5 $\pm$ 0.39                 | 126.4 $\pm$ 1.99 | 141.7 $\pm$ 4.50  | 3.8 $\pm$ 0.23 | 2.4 $\pm$ 0.34 |
| 24                      | 7.84 $\pm$ 0.055 | 315 $\pm$ 11.9    | 31 $\pm$ 4.3   | 4.7 $\pm$ 0.43                 | 124.1 $\pm$ 6.58 | 140.6 $\pm$ 12.62 | 4.0 $\pm$ 0.32 | 2.5 $\pm$ 0.70 |
| 48                      | 7.87 $\pm$ 0.062 | 292 $\pm$ 3.3     | 28 $\pm$ 2.7   | 4.6 $\pm$ 0.30                 | 132.1 $\pm$ 5.93 | 143.7 $\pm$ 6.70  | 2.8 $\pm$ 0.14 | 1.5 $\pm$ 0.06 |
| 72                      | 7.94 $\pm$ 0.033 | 287 $\pm$ 3.1     | 33 $\pm$ 3.2   | 5.0 $\pm$ 0.10                 | 115.2 $\pm$ 1.22 | 131.9 $\pm$ 1.57  | 2.7 $\pm$ 0.15 | 1.7 $\pm$ 0.11 |
| 144                     | 8.03 $\pm$ 0.013 | 267 $\pm$ 6.7     | 24 $\pm$ 1.3   | 5.2 $\pm$ 0.23                 | 109.0 $\pm$ 2.93 | 123.7 $\pm$ 4.25  | 3.8 $\pm$ 0.38 | 1.7 $\pm$ 0.18 |
| 216                     | 7.91 $\pm$ 0.041 | 286 $\pm$ 4.6     | 23 $\pm$ 2.4   | 4.6 $\pm$ 0.64                 | 111.2 $\pm$ 4.10 | 133.7 $\pm$ 4.86  | 2.4 $\pm$ 0.12 | 1.8 $\pm$ 0.16 |
| <b>(B) Sardine diet</b> |                  |                   |                |                                |                  |                   |                |                |
| 0 (Control)             | 8.21 $\pm$ 0.022 | 321 $\pm$ 5.5     | 21 $\pm$ 0.5   | 2.7 $\pm$ 0.21                 | 129.5 $\pm$ 4.14 | 158.3 $\pm$ 5.45  | 4.5 $\pm$ 0.13 | 2.5 $\pm$ 0.28 |
| 3                       | 8.31 $\pm$ 0.029 | 322 $\pm$ 4.0     | 20 $\pm$ 2.4   | 2.4 $\pm$ 0.19                 | 120.0 $\pm$ 1.64 | 149.9 $\pm$ 3.25  | 6.4 $\pm$ 0.14 | 1.9 $\pm$ 0.20 |
| 6                       | 8.34 $\pm$ 0.040 | 323 $\pm$ 2.9     | 21 $\pm$ 1.0   | 3.8 $\pm$ 0.23                 | 124.3 $\pm$ 1.42 | 145.1 $\pm$ 1.61  | 4.4 $\pm$ 0.34 | 2.3 $\pm$ 0.06 |
| 12                      | 8.30 $\pm$ 0.032 | 315 $\pm$ 2.5     | 23 $\pm$ 1.3   | 4.2 $\pm$ 0.46                 | 127.5 $\pm$ 1.52 | 145.8 $\pm$ 1.81  | 4.1 $\pm$ 0.15 | 2.6 $\pm$ 0.09 |
| 24                      | 7.95 $\pm$ 0.033 | 312 $\pm$ 3.9     | 17 $\pm$ 1.9   | 2.2 $\pm$ 0.50                 | 114.2 $\pm$ 2.46 | 139.1 $\pm$ 3.60  | 4.7 $\pm$ 0.30 | 2.8 $\pm$ 0.58 |
| 48                      | 7.65 $\pm$ 0.015 | 320 $\pm$ 2.1     | 28 $\pm$ 2.8   | 5.3 $\pm$ 0.25                 | 130.0 $\pm$ 2.18 | 147.1 $\pm$ 1.75  | 2.8 $\pm$ 0.19 | 1.6 $\pm$ 0.12 |
| 72                      | 8.01 $\pm$ 0.047 | 319 $\pm$ 1.2     | 35 $\pm$ 1.2   | 5.0 $\pm$ 0.24                 | 130.3 $\pm$ 1.39 | 149.5 $\pm$ 1.68  | 3.7 $\pm$ 0.18 | 1.3 $\pm$ 0.03 |
| 144                     | 7.74 $\pm$ 0.063 | 337 $\pm$ 4.2     | 35 $\pm$ 1.6   | 3.4 $\pm$ 0.68                 | 130.0 $\pm$ 2.06 | 154.1 $\pm$ 2.20  | 6.8 $\pm$ 1.41 | 1.4 $\pm$ 0.08 |
| 216                     | 7.86 $\pm$ 0.043 | 321 $\pm$ 3.6     | 23 $\pm$ 3.1   | 5.3 $\pm$ 0.47                 | 127.3 $\pm$ 2.45 | 155.6 $\pm$ 3.66  | 4.2 $\pm$ 0.09 | 1.6 $\pm$ 0.13 |

Values are means  $\pm$  s.e.m. ( $N=10$  for control samples,  $N=5$  for all others).

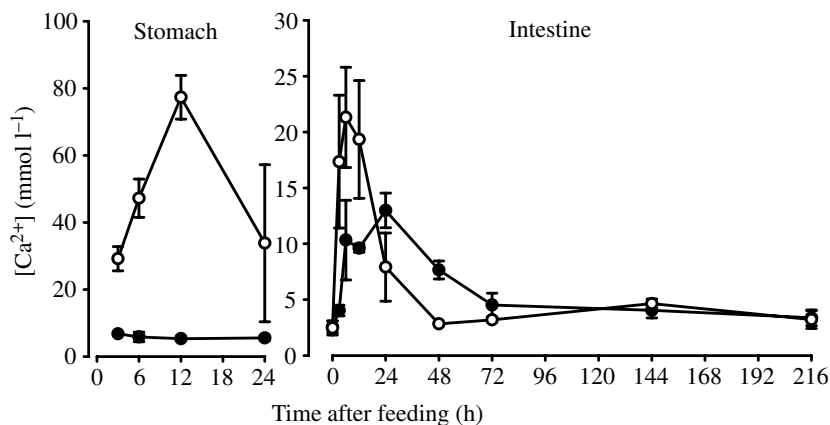

Fig. 5.  $Ca^{2+}$  concentrations in the stomach and anterior intestinal fluids of *Opsanus beta* fed squid (filled circles) and fish (open circles). Values are means  $\pm$  1 s.e.m.,  $N=5$  for most samples, as described in text.

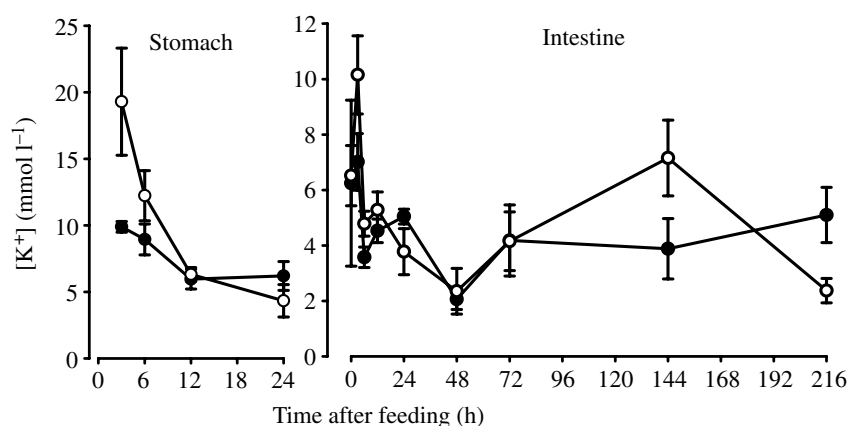

Fig. 6.  $K^+$  concentrations in the stomach and anterior intestinal fluids of *Opsanus beta* fed squid (filled circles) and fish (open circles). Values are means  $\pm$  1 s.e.m.,  $N=5$  for most samples, as described in text.

to the gastrointestinal tract of toadfish fed sardines, no increase in plasma  $Ca^{2+}$  concentration was observed in fish fed either diet (Table 3).

Another difference in diets was suggested by the  $K^+$  loads carried to the gastrointestinal tract. While  $K^+$  levels of the two diets were similar (Table 1), mean  $K^+$  concentrations in the stomach and anterior intestine of toadfish fed sardines were approximately 2 and 1.5 times those in squid-fed toadfish, respectively (Fig. 6). Additionally, we saw a nearly 50% increase in mean plasma  $K^+$  concentrations 3 h post-feeding in

toadfish fed sardines (Table 3B), although sample sizes were too small to gain statistical significance.

#### Intestinal water absorption and divalent ion concentration

Immediately following feeding, mean intestinal  $Mg^{2+}$  and  $SO_4^{2-}$  concentrations were reduced to as little as 36% and 42% of control concentrations, respectively, in toadfish fed a squid diet (Fig. 7A and Fig. 8A, respectively, and Table 2). This decline in both  $Mg^{2+}$  and  $SO_4^{2-}$  concentrations was statistically significant only in the mid intestinal fluid 3 h post-feeding. A

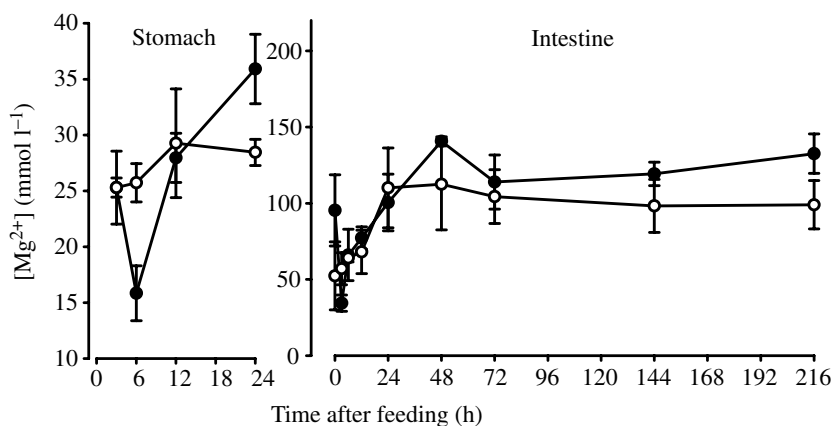

Fig. 7.  $Mg^{2+}$  concentrations in the stomach and anterior intestinal fluids of *Opsanus beta* fed squid (filled circles) and fish (open circles). Values are means  $\pm$  1 s.e.m.,  $N=5$  for most samples, as described in text.



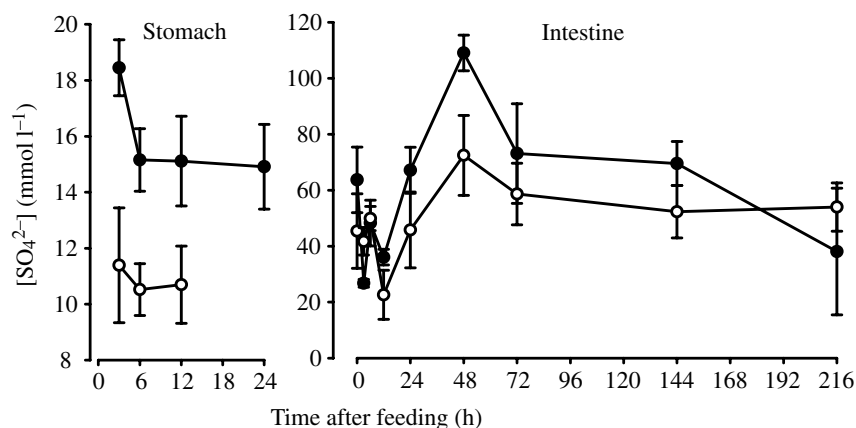

Fig. 8.  $\text{SO}_4^{2-}$  concentrations in the stomach and anterior intestinal fluids of *Opsanus beta* fed squid (filled circles) and fish (open circles). Values are means  $\pm$  1 s.e.m.,  $N=5$  for most samples, as described in text.

postprandial reduction in intestinal  $\text{Mg}^{2+}$  and  $\text{SO}_4^{2-}$  concentrations was also noted in toadfish fed sardines (Fig. 7B and Fig. 8B, respectively, and Table 2), though these ions were only reduced to as little as 65% and 50% control conditions, respectively, and exhibited no statistically significant differences from control concentrations. By 48 h post feeding, however, water absorption rather than secretion appears to have resumed in full force as intestinal  $\text{Mg}^{2+}$  and  $\text{SO}_4^{2-}$  concentrations return to and even exceed their high levels in control fish.

#### Osmotic coefficients in monovalent and divalent solutions

Our experimental determination of divalent and monovalent solution osmotic coefficients yielded an osmotic coefficient of 0.91 ( $\pm 0.002$ ) for the monovalent solution NaCl, and an osmotic coefficient of 0.56 ( $\pm 0.004$ ) for the divalent solution  $\text{MgSO}_4$ . Thus a replacement along the gastrointestinal tract of monovalent ions with divalent ions will facilitate water absorption by lowering osmotic pressure in the lumen.

#### Organic nutrient absorption

By calculating the difference between measured osmolality and the sum of inorganic ion concentrations in a given sample, we were able to conservatively predict the concentration (mEqv) of organic solutes present in the sample. Measured plasma osmolality is consistently significantly higher than the sum of inorganic ions (Fig. 9A) of fish fed both diets. In toadfish fed a squid diet (Fig. 9Ai), there is a statistically significant rise in plasma osmolality 12 h post-feeding, but not a significant increase in the sum of inorganic ion concentration.

The very high stomach osmolality 3 h post-feeding in toadfish fed a squid diet comprises less than 45% inorganic ions (Fig. 9Bi), while the stomach osmolality in toadfish fed sardines was significantly lower and composed of approximately 75% inorganic ions (Fig. 9Bii). The stomach of toadfish fed sardines also held a significantly greater concentration of inorganic ions than did the squid diet. The gap between stomach osmolality and inorganic ion sum became progressively narrower as time after feeding increased, until most organic solutes in the stomach were absorbed or passed on to the intestine by 24 h post feeding in toadfish fed squid, and 12 h in toadfish fed fish. In the

stomach, this gap (thus the estimated concentration of organic solutes) was statistically significant between 3 and 12 h after feeding in toadfish fed a squid diet, and between 3 and 6 h post-feeding in toadfish fed sardines. Along the intestine, osmolality exceeds total ion sum until 24–48 h post-feeding, when osmolality drops and total inorganic ion sum increases above the corresponding osmotic pressure as gastrointestinal conditions return to baseline levels.

#### Disturbed acid–base balance?

Plasma pH (Table 3) did not exhibit strong trends in toadfish fed either diet, although it was significantly increased over control conditions at 3 h post-feeding in toadfish fed a squid diet. No statistically significant changes were seen in plasma pH of toadfish fed sardines. Also, no significant changes in plasma  $\text{HCO}_3^-$  (Table 3) were measured postprandially in either diet.

#### Discussion

Feeding results in substantial changes in the ionic composition of intestinal fluids; notably, an acute influx of dietary salts prompts apparent transient changes in fluid absorption/secretion and stimulation of intestinal  $\text{HCO}_3^-$  secretion. The mechanisms of these intestinal transport properties (and changes therein) may be unique to digestive physiology or may be identical to mechanisms utilized to osmoregulate in a marine environment.

#### Postprandial intestinal $\text{Cl}^-/\text{HCO}_3^-$ exchange

While we anticipated an influx of  $\text{Cl}^-$  to the anterior intestine due to the passage of gastric HCl secretions, we measured intestinal  $\text{Cl}^-$  concentrations that markedly decreased immediately (by 3 h) following feeding and remained depressed for at least 48 h. Based on these reduced luminal  $\text{Cl}^-$  concentrations and on measurements of unchanged  $\text{Na}^+$  concentrations between 3 and 48 h post-feeding, we presume that elevated levels of intestinal  $\text{HCO}_3^-$  at 48 h post-feeding cannot be accounted for by pancreatic-like secretion. Pancreatic secretions at least in higher vertebrates consist of a  $\text{NaHCO}_3$ -rich solution (Steward et al., 2005). Buffering of

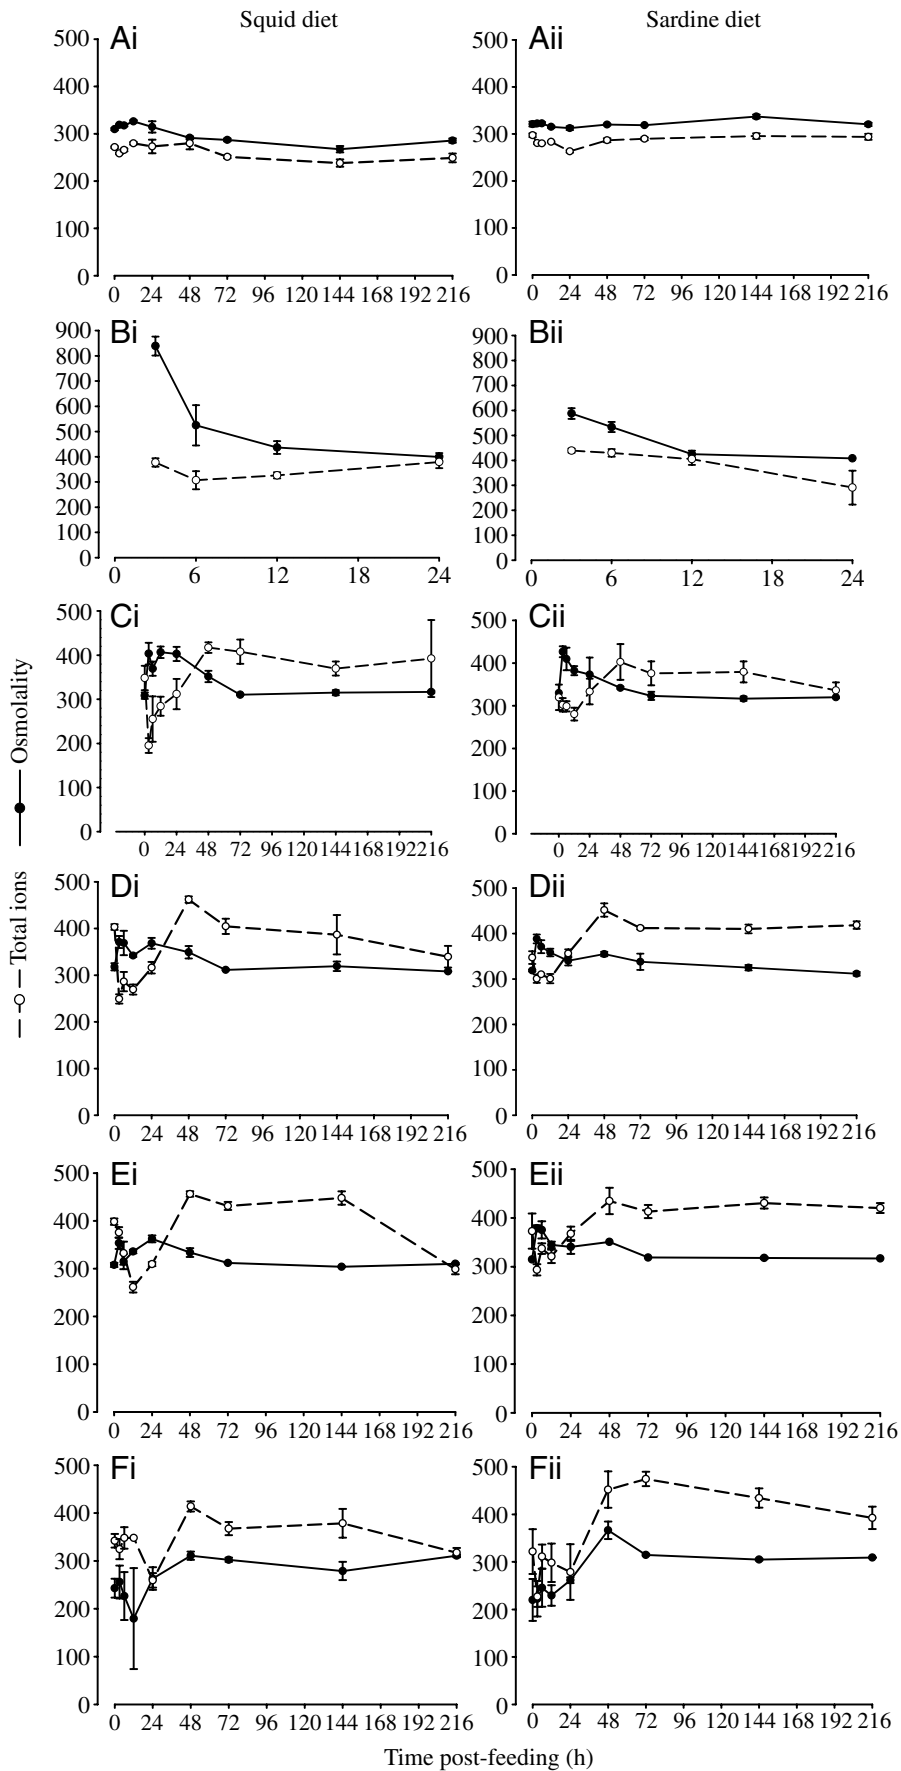

highly acidic chyme entering the intestine from the stomach to circumneutral and alkaline pH likely consumes much of the  $\text{HCO}_3^-$  secreted into the intestine. Increased apical  $\text{Cl}^-/\text{HCO}_3^-$  exchange may be stimulated postprandially either by a signal directly related to the act of feeding, by reduced luminal pH as has been shown in European flounder (Wilson and Grosell, 2003), or by osmoregulatory challenges to the gastrointestinal tract that result from ingesting a large meal. Regardless of the mechanism of stimulation, intestinal  $\text{Cl}^-/\text{HCO}_3^-$  exchange appears beneficial both in neutralizing luminal pH and in serving  $\text{Cl}^-$  and water absorption across the intestinal epithelium between 3 and 48 h after feeding. Immediately (3 h) post-feeding, the anterior intestine of toadfish fed sardines becomes more acidified (Fig. 1) and has a higher  $\text{Cl}^-$  concentration (Fig. 3) than that of toadfish fed a squid diet. These observations together seem to indicate elevated gastric HCl secretion in fish fed sardines. Correspondingly, toadfish fed sardines experienced the highest intestinal  $\text{HCO}_3^-$  levels we measured during these experiments at 48 h post-feeding (Fig. 2B, Table 2). While stomach pH was not significantly different between fish fed the two diets at any time point, we imagine that a larger volume of acid would be required to acidify chopped fish (buffered by carbonate and phosphate salts characteristic of cycloid scales and bone) to a similar pH as chopped squid. Common sense attests that increased gastric acid secretion and/or a prolonged gastric holding time should increase assimilation efficiency for a more difficult to digest meal (i.e. a fish diet containing scales and bone). This topic has so far only been discussed with reference to the potential of diet

Fig. 9. Osmolality (solid line) and ion sum (broken line) of plasma (A), stomach (B), anterior intestine (C), mid intestine (D), posterior intestine (E), and rectal (F) fluid of *Opsanus beta* fed squid (Ai–Fi) and fish (Aii–Fii). Values are means  $\pm$  1 s.e.m.,  $N=5$  for most samples, as described in text.

acidification to increase phosphorus (as bone phosphate in fish meal) assimilation in aquaculture as a means of reducing eutrophication by undigested P in these systems (Vielma and Lall, 1997; Vielma et al., 1999; Sugiura and Hardy, 2000). A review of the pylorus (Ramkumar and Schulze, 2005) indicates that, at least in mammals tested to date, the pylorus adjusts gastric outflow resistance to meet physiological needs as a function of chemical (acidification) and physical (mechanical) action by the stomach. We assume that the release of chyme is controlled by a similar mechanism in toadfish which, like most teleosts, possess a true stomach and pyloric sphincter. Notably, because our fish were fed to satiation, we observed upon dissection that the stomach of nearly all fish was so distended as to indicate the possibility that small amounts of chyme had entered the anterior intestine regardless of the state of contraction of the pyloric sphincter – a likely explanation for the immediate decrease in anterior intestine pH following feeding. Many ectothermic vertebrates also experience very large meals (often containing bone) at infrequent intervals; an exceptionally high volume of gastric acid secretion and long holding time are likely reasons for an especially pronounced alkaline tide response in these animals (for a review, see Wang et al., 2001).

Intestinal  $\text{HCO}_3^-$  secretion may also act in part to regulate acute dietary  $\text{Ca}^{2+}$  influx. In addition to a larger influx of HCl to the intestine of toadfish fed sardines, maximal  $\text{Ca}^{2+}$  concentrations (reached 6 h post-feeding) in the anterior intestine were over twofold those in fish fed a squid diet, yielding another possible reason for a larger peak of postprandial  $\text{HCO}_3^-$  levels in toadfish fed sardines. This may suggest an additional role of postprandial intestinal  $\text{HCO}_3^-$  secretion in leading to increased  $\text{CaCO}_3$  precipitation to serve  $\text{Ca}^{2+}$  excretion during digestion of high calcium meals, as plasma  $\text{Ca}^{2+}$  concentrations were not increased postprandially in either diet (Table 3). Notably,  $\text{Ca}^{2+}$  concentrations in the posterior intestinal and rectal fluids never reached levels as high as those measured in the anterior and mid intestine fluid (Table 2). This difference could be accounted for by increased  $\text{CaCO}_3$  precipitation, which was unaccounted for by our measurements, and likely is a main route of  $\text{Ca}^{2+}$  excretion in the absence of major  $\text{Ca}^{2+}$  absorption to the extracellular fluid.

#### *Disturbed acid–base balance?*

The statistically significant yet transient increase in plasma pH we measured 3 h post-feeding in toadfish fed a squid diet (Table 3A) indicates the possibility of a postprandial alkaline tide; however, the inconsistency in both control and treatment plasma pH values is a cause for reservation. The absence of plasma alkalization in toadfish fed sardines (Table 3B), and unchanged plasma  $\text{HCO}_3^-$  concentrations in fish fed both diets (Table 3), suggest that feeding-induced acid–base balance disturbance is lacking in Gulf toadfish even when fed a 9% (of body mass) meal. Notably, due to the nature of the caudal puncture technique, blood samples may have contained a variable mixture of arterial and venous blood and may also have been influenced by tissue lactic acid release following

anesthetic overdose. While our measurements indicated the absence of acid–base balance disturbance, plasma pH and  $\text{HCO}_3^-$  concentrations were increased between 3 and 9 h after feeding in Pacific spiny dogfish (Wood et al., 2005), with virtually no evidence of respiratory compensation that is common among other vertebrate classes (Andrade et al., 2004).

It has been shown in fishes that ventilatory adjustments have only a small effect on blood  $P_{\text{CO}_2}$  levels (Perry and Wood, 1989; Wood et al., 2005) and thus we would expect an alkaline tide to reveal itself exclusively in plasma pH and  $\text{HCO}_3^-$  concentrations as in the spiny dogfish (Wood et al., 2005). We suggest additional experiments employing a more detailed time course, along with cannulation to provide for continual sampling, on a larger number of fish, before concluding the presence or absence of a postprandial alkaline tide in Gulf toadfish. It is possible that plasma alkalization might be absent or reduced by branchial base efflux, although this was not measured in our experiments. Metabolic  $\text{HCO}_3^-$  is secreted by the gastric oxyntopeptic cell (gastric epithelial cells in non-mammalian vertebrates, secreting both HCl and pepsinogen) basolaterally into the extracellular fluid as a mechanism of alleviating cellular alkalosis. This  $\text{HCO}_3^-$  may be immediately transported across the gill, assumedly *via* either a  $\text{Cl}^-/\text{HCO}_3^-$  exchanger or  $\text{Na}^+-\text{HCO}_3^-$  cotransport [NBC; see Evans et al. (Evans et al., 2005)], thus no plasma alkalization would be measured. If this is indeed the case, one may expect a more pronounced alkaline tide in freshwater fish, in which branchial anion exchange would presumably be limited by low environmental  $\text{Cl}^-$  concentrations.

Another possible explanation for the lack of alkaline tide response lies in intestinal  $\text{HCO}_3^-$  secretion. As apical acid secretion by the gastric oxyntopeptic cell prompts basolateral secretion of metabolic  $\text{HCO}_3^-$  into the extracellular fluid, it is possible that this  $\text{HCO}_3^-$  provides additional substrate for intestinal  $\text{Cl}^-/\text{HCO}_3^-$  exchange, which appears to be enhanced during digestion. This hypothesis, however, has several caveats. One involves the uncertainty of possible mechanisms responsible for transporting  $\text{HCO}_3^-$  to the intestine from the serosal side of the gastric oxyntopeptic cell. In fact, the mechanism transporting  $\text{HCO}_3^-$  to the systemic blood circulation thus creating an alkaline tide has not yet been described (for a review, see Niv and Fraser, 2002). A second caveat lies in the mechanism of  $\text{HCO}_3^-$  entry into the intestinal epithelium cell. Recent reports show that the majority of  $\text{HCO}_3^-$  secreted into the intestinal lumen to serve osmoregulation arises from hydration of endogenous  $\text{CO}_2$  in the epithelial cells of the intestine (Wilson et al., 2002; Grosell and Genz, 2006) (reviewed by Grosell, 2006). Therefore, we suppose that  $\text{HCO}_3^-$  secreted basolaterally by the gastric parietal cells would have to either be dehydrated to  $\text{CO}_2$  to enter the intestinal epithelium cell diffusively, or an additional transport pathway, such as basolateral NBC, must be supplying the intestinal epithelial cells with excess  $\text{HCO}_3^-$  during the period of postprandially stimulated  $\text{HCO}_3^-$  secretion. Clearly, postprandial acid–base balance in seawater and freshwater fishes deserves additional attention.

*Gastrointestinal water and monovalent ion absorption and divalent ion concentration*

Intestinal  $Mg^{2+}$  and  $SO_4^{2-}$  concentrations are good markers for water absorption (Smith, 1930), as these divalent ions see only very modest absorption across the intestinal epithelium, and are not known to precipitate to the extent that  $Ca^{2+}$  does in intestinal carbonate pellets (Walsh et al., 1991). A drop in luminal  $Mg^{2+}$  and  $SO_4^{2-}$  concentrations between 3 and 48 h after feeding presumably indicates an influx of gastric, biliary, intestinal and perhaps pancreatic secretions in addition to transient diffusive water gain. The intestinal lumen and certainly the stomach contents are hyperosmotic to the extracellular fluids, which would facilitate diffusive water movement into the gastrointestinal tract. Additionally, seawater ingestion has been shown both prandially *via* incidental intake and postprandially *via* drinking (Kristiansen and Rankin, 2001). Together, it appears that these factors act to temporarily dilute the divalent ions that normally persist in marine teleost intestinal fluids (Marshall and Grosell, 2006). An increase in  $Mg^{2+}$  and especially  $SO_4^{2-}$  concentrations over control levels at 48 h post-feeding, though not statistically significant, indicates the possibility of a period of highly increased intestinal water absorption. This is conveniently the same time point at which intestinal  $HCO_3^-$  levels are maximal, luminal  $Cl^-$  concentrations are still reduced, and organic nutrients have been largely absorbed. Anterior intestinal fluid in both starved and fed fish is composed predominantly of monovalent ions  $Cl^-$  and  $Na^+$ , while a notable shift towards divalents  $Mg^{2+}$  and  $SO_4^{2-}$  occurs posteriorly. Based on our calculated osmotic coefficients for monovalent and divalent solutions, an intestinal fluid rich in divalent ions will act to facilitate water absorption in the posterior intestine by enhancing the transepithelial osmotic gradient by reducing the effective osmolality on the luminal side.

*Organic nutrient absorption*

Osmolality and inorganic ion sum measurements of gastrointestinal fluids allow us to predict a timeline for organic nutrient absorption. Organic nutrient absorption seems to occur in the greatest magnitude in the stomach of toadfish fed a squid diet (Fig. 9Bi), and be completed in all segments of the intestine by 48 h post feeding in both diets (Fig. 9C–F). In addition to diminishing over time, the amount of organic solutes in the fluids of each intestinal segment at any given time is slightly reduced in progressively posterior intestinal sections. This not only indicates a consistent ability of the entire length of the intestinal epithelium to absorb organic nutrients, but also indicates that organic nutrients are truly being absorbed and not just passed along to posterior sections of the gastrointestinal tract. In addition, we saw a clear shift in intestinal fluid composition between 24 and 48 h post-feeding in which osmolality decreases markedly and is exceeded by the sum of inorganic ions. This indicates a trend towards divalent ions, which have a lower osmotic coefficient than monovalents and thus account for the difference between inorganic ion sum (which assumes an osmotic coefficient of one) and actual

osmolality. This difference between inorganic ion sum and actual osmolality is elevated progressively in posterior sections, indicating that in addition to organic nutrient absorption, water absorption also is consistent and cumulative along the intestine.

A transient but significant increase in plasma osmolality 12 h post-feeding in toadfish fed a squid diet in the absence of a significant increase in inorganic ion sum might be attributed to a high amino acid content in squid, although organic solute concentrations were not measured directly in these experiments.

*Conclusions*

Above all, we have shown with these experiments that feeding transiently and acutely alters the gastrointestinal physiology of Gulf toadfish, and that these physiological changes are dependent upon diet composition. In addition to dramatically changing both the inorganic and organic ionic composition along the gastrointestinal tract, we also saw evidence for transient changes in water and solute secretion and absorption across the gastric and intestinal epithelia as time passed after feeding. By demonstrating a limited or lack of postprandial alkaline tide, we have raised questions about postprandial disruption to acid–base balance in seawater and freshwater fish, and the fate of metabolic  $HCO_3^-$  secreted basolaterally by gastric oxyntopeptic cells. The next question begging an answer is the regulation of intestinal  $HCO_3^-$  secretion. Since we have shown strong evidence that apical  $Cl^-/HCO_3^-$  exchange is stimulated in the intestine by feeding, regardless of the diet, it is possible that intestinal anion exchange is stimulated by parameters relating to ingestion of a meal itself and/or by the osmoregulatory and acid–base challenges that result. Conjecture might tie these questions of acid–base balance and anion exchange together by explaining the lack of an alkaline tide with increased intestinal  $HCO_3^-$  secretion, although this remains to be documented.

We thank Jimbo's shrimp, Virginia Key, FL, USA, for providing toadfish for these experiments. Work was supported by a University of Miami fellowship to J.R.T., and a National Science Foundation Grant to M.G. (NSF 0416440).

**References**

- Andrade, D. V., De Toledo, L. F., Abe, A. S. and Wang, T. (2004). Ventilatory compensation of the alkaline tide during digestion in the snake *Boa constrictor*. *J. Exp. Biol.* **207**, 1379–1385.
- Dabrowski, K., Leray, C., Nonnotte, G. and Colin, D. A. (1986). Protein digestion and ion concentrations in Rainbow trout (*Salmo Gairdnerii* Rich.) digestive tract in sea- and fresh water. *Comp. Biochem. Physiol.* **83A**, 27–39.
- Evans, D. H., Piermarini, P. M. and Choe, K. P. (2005). The multifunctional fish gill: dominant site of gas exchange, osmoregulation, acid-base regulation, and excretion of nitrogenous waste. *Physiol. Rev.* **85**, 97–177.
- Grosell, M. (2006). Intestinal anion exchange in marine fish osmoregulation. *J. Exp. Biol.* **209**, 2813–2827.
- Grosell, M. and Genz, J. (2006). Ouabain sensitive bicarbonate secretion and acidic fluid absorption by the marine teleost intestine play a role in osmoregulation. *Am. J. Phys. Regul. Physiol.* In Press.



- Grosell, M., O'Donnell, M. J. and Wood, C. M.** (2000). Hepatic versus gallbladder bile composition: in vivo transport physiology of the gallbladder in rainbow trout. *Am. J. Physiol.* **278**, R1674-R1684.
- Grosell, M., McDonald, M. D., Wood, C. M. and Walsh, P. J.** (2004). Effects of Prolonged copper exposure in the marine gulf toadfish (*Opsanus beta*). I. Hydromineral balance and plasma nitrogenous waste products. *Aquat. Toxicol.* **68**, 249-262.
- Grosell, M., Wood, C. M., Wilson, R. W., Bury, N. R., Hogstrand, C., Rankin, C. and Jensen, F. B.** (2005). Bicarbonate secretion plays a role in chloride and water absorption of the European flounder intestine. *Am. J. Physiol.* **288**, 936-946.
- Kristiansen, H. R. and Rankin, C. J.** (2001). Discrimination between endogenous and exogenous water sources in juvenile rainbow trout fed extruded dry feed. *Aquat. Living Resour.* **14**, 359-366.
- Marshall, W. S. and Grosell, M.** (2006). Ion transport and osmoregulation in fish. In *The Physiology of Fishes* (ed. D. Evans), pp. 177-230. Boca Raton, FL: CRC Press.
- McDonald, M. D. and Grosell, M.** (2006). Maintaining osmotic balance with an aglomerular kidney. *Comp. Biochem. Physiol.* **143A**, 447-458.
- McDonald, M. D., Grosell, M., Wood, C. M. and Walsh, P. J.** (2003). Branchial and Renal handling of urea in the gulf toadfish, *Opsanus beta*: the effect of exogenous urea loading. *Comp. Biochem. Physiol.* **134A**, 763-776.
- Niv, Y. and Fraser, G. M.** (2002). The alkaline tide phenomenon. *J. Clin. Gastroenterol.* **35**, 5-8.
- Novak, I.** (2000). Keeping up with bicarbonate. *J. Physiol.* **528**, 235.
- Perry, S. F. and Wood, C. M.** (1989). Control and co-ordination of gas transfer in fishes. *Can. J. Zool.* **67**, 2961-2970.
- Ramkumar, D. and Schulze, K. S.** (2005). The pylorus. *Neurogastroenterol. Motil.* **17**, 22-30.
- Shehadeh, Z. H. and Gordon, M. S.** (1969). The role of the intestine in salinity adaptation of the rainbow trout, *Salmo gairdneri*. *Comp. Biochem. Physiol.* **30**, 397-418.
- Smith, H. W.** (1930). The absorption and excretion of water and salts by marine teleosts. *Am. J. Physiol.* **93**, 480-505.
- Steward, M. C., Ishiguro, H. and Case, R. M.** (2005). Mechanisms of bicarbonate secretion in the pancreatic duct. *Annu. Rev. Physiol.* **67**, 377-409.
- Sugiura, S. H. and Hardy, R. W.** (2000). Environmentally friendly feeds. In *Encyclopedia of Aquaculture* (ed. R. R. Stickney), pp. 299-310. New York: John Wiley & Sons.
- Taylor, J. R. and Grosell, M.** (2006). Evolutionary aspects of intestinal bicarbonate secretion in fish. *Comp. Biochem. Physiol.* **143A**, 523-529.
- Thomas, H. A. and Machen, T. E.** (1991). Regulation of Cl/HCO<sub>3</sub> exchange in gastric parietal cells. *Cell Regul.* **2**, 727-737.
- Vielma, J. and Lall, S. P.** (1997). Dietary formic acid enhances apparent digestibility of minerals in rainbow trout, *Oncorhynchus mykiss* (Walbaum). *Aquac. Nutr.* **3**, 265-268.
- Vielma, J., Ruohonen, K. and Lall, S. P.** (1999). Supplemental citric acid and particle size of fish bone-meal influence the availability of minerals in rainbow trout *Oncorhynchus mykiss* (Walbaum). *Aquac. Nutr.* **5**, 65-71.
- Walsh, P. J., Blackwelder, P. K., Gill, A., Danulat, E. and Mommsen, T. P.** (1991). Carbonate deposits in marine fish intestines: a new source of biomineralization. *Limnol. Oceanogr.* **36**, 1227-1232.
- Wang, T., Busk, M. and Overgaard, J.** (2001). The respiratory consequences of feeding in amphibians and reptiles. *Comp. Biochem. Physiol.* **128A**, 535-549.
- Wilson, R. W. and Grosell, M.** (2003). Intestinal bicarbonate secretion in marine teleost fish – source of bicarbonate, pH sensitivity, and consequence for whole animal acid-base and divalent cation homeostasis. *Biochim. Biophys. Acta* **1618**, 163-193.
- Wilson, R. W., Gilmour, K. M., Henry, R. P. and Wood, C. M.** (1996). Intestinal base excretion in the seawater-adapted rainbow trout: a role in acid-base balance? *J. Exp. Biol.* **199**, 2231-2343.
- Wilson, R. W., Wilson, J. M. and Grosell, M.** (2002). Intestinal bicarbonate secretion by marine teleost fish – why and how? *Biochim. Biophys. Acta* **1566**, 182-193.
- Wood, C. M., Kajimura, M., Mommsen, T. P. and Walsh, P. J.** (2005). Alkaline tide and nitrogen conservation after feeding in an elasmobranch (*Squalus acanthias*). *J. Exp. Biol.* **208**, 2693-2705.
